# Supplementary material for: Construction of an eight-basement membrane related gene signature for predicting prognosis and immune response in hepatocellular carcinoma
Source: Research Square preprint supplement (doi:10.21203/rs.3.rs-7950093/v1), 2025-11-06
Supplement: Supplementary file 1 [file a41870cfc198d17a24b0164b.docx]

**Construction of an eight-basement membrane related gene signature for predicting prognosis and immune response in hepatocellular carcinoma**

a,#Xiaohan Zhang, b,#Guanlin Wu, cJiayao Li, cLianhong Yin, cMeng Gao, cXu Han, cXuerong Zhao, cLina Xu

a Department of Pharmacy, Dalian Women and Children’s Medical Group, Dalian 116024, China

b Department of Pharmacy, Central Hospital of Dalian University of Technology, Dalian 116000, China;

c College of Pharmacy, Dalian Medical University, Western 9 Lvshunnan Road, Dalian 116044, China;

# These authors contributed equally to this work

Corresponding author,

Dr. Lina Xu

College of Pharmacy

Dalian Medical University

Western 9 Lvshunnan Road

Dalian, China

E-mail: xulina627@163.com

Table S1. The basement membrane related genes (BMRGs) retrieved from the previous literature (Jayadev et al, 2022).

| Genes | Genes | Genes | Genes | Genes |
| --- | --- | --- | --- | --- |
| ACAN | FBLN5 | SMOC2 | ITGA10 | SLIT2 |
| ADAM10 | FBN1 | SPARC | ITGA2 | SLIT3 |
| ADAM17 | FBN2 | TENM3 | ITGA4 | SPARCL1 |
| ADAM9 | FGF9 | TENM4 | ITGA5 | SPOCK1 |
| ADAMTS10 | FN1 | TGFB2 | ITGA9 | SPOCK2 |
| ADAMTS13 | FRAS1 | TGFBI | ITGAM | SPOCK3 |
| ADAMTS17 | FREM1 | TIMP3 | ITGAV | SPON1 |
| ADAMTS18 | FREM2 | TLL1 | ITGAX | SPON2 |
| ADAMTS2 | GPC3 | TNC | ITGB1 | TENM1 |
| ADAMTS3 | GPC4 | USH2A | ITGB5 | TENM2 |
| AGRN | GPC6 | VCAN | ITGB7 | THBS1 |
| AMELX | HMCN1 | ACHE | ITGB8 | THBS2 |
| AMTN | HSPG2 | ADAMTS1 | LAD1 | THBS4 |
| ANG | ITGA2B | ADAMTS14 | LAMA5 | TIMP1 |
| BGN | ITGA3 | ADAMTS15 | LAMB4 | TIMP2 |
| CD151 | ITGA6 | ADAMTS16 | LAMC1 | TINAG |
| CERT1 | ITGA7 | ADAMTS19 | LOXL2 | TINAGL1 |
| COL12A1 | ITGA8 | ADAMTS20 | LOXL4 | UNC5A |
| COL13A1 | ITGB2 | ADAMTS4 | LUM | UNC5B |
| COL17A1 | ITGB3 | ADAMTS5 | MATN1 | UNC5C |
| COL18A1 | ITGB4 | ADAMTS6 | MATN2 | UNC5D |
| COL2A1 | ITGB6 | ADAMTS7 | MATN4 | VTN |
| COL4A1 | LAMA1 | ADAMTS8 | MEGF6 | VWA1 |
| COL4A2 | LAMA2 | ADAMTS9 | MEGF9 |  |
| COL4A3 | LAMA3 | BCAN | MEP1A |  |
| COL4A4 | LAMA4 | CCDC80 | MEP1B |  |
| COL4A5 | LAMB1 | CD44 | MMP17 |  |
| COL4A6 | LAMB2 | COL14A1 | MMP26 |  |
| COL5A1 | LAMB3 | COL15A1 | MMP7 |  |
| COL6A1 | LAMC2 | COL28A1 | MMRN2 |  |
| COL6A2 | LAMC3 | COL8A1 | NELL1 |  |
| COL6A3 | LOXL1 | CSPG4 | NELL2 |  |
| COL7A1 | MMP1 | DDR1 | NID1 |  |
| COL8A2 | MMP14 | EGFL6 | NID2 |  |
| COL9A1 | MMP2 | EGFLAM | NPNT |  |
| COL9A2 | MMP21 | EVA1A | NTN4 |  |
| COL9A3 | MPZL2 | EVA1B | OGN |  |
| COLQ | MUSK | EVA1C | OPTC |  |
| CST3 | NTN1 | FBLN2 | PAPLN |  |
| CTSA | P3H1 | FBN3 | PHF13 |  |
| CTSB | P3H2 | FMOD | PODN |  |
| CTSD | PTPRF | FREM3 | POSTN |  |
| DAG1 | PXDN | GPC1 | PTN |  |
| DCC | ROBO2 | GPC2 | PXDNL |  |
| DCN | ROBO3 | GPC5 | RECK |  |
| DDR2 | ROBO4 | HAPLN1 | ROBO1 |  |
| ECM1 | RPSA | HAPLN2 | SDC1 |  |
| EFEMP1 | SERPINF1 | HMCN2 | SDC4 |  |
| EFEMP2 | SMC3 | ISLR | SEMA3B |  |
| FBLN1 | SMOC1 | ITGA1 | SLIT1 |  |

Table S2. The BM-related DEGs identified between tumor tissue and adjacent nontumorous tissues in the TCGA dataset.

| Gene | ConMean | TreatMean | logFC | *P* value | fdr |
| --- | --- | --- | --- | --- | --- |
| ACAN | 0.008702 | 0.194373 | 4.481405 | 2.30E-15 | 1.10E-14 |
| ADAMTS13 | 5.109747 | 1.122188 | -2.18694 | 6.66E-28 | 5.56E-26 |
| ADAMTS18 | 0.003569 | 0.049336 | 3.78923 | 3.97E-10 | 1.21E-09 |
| COL2A1 | 0.003647 | 3.651171 | 9.967305 | 1.44E-07 | 3.11E-07 |
| COL4A1 | 5.149687 | 28.0692 | 2.446431 | 2.57E-22 | 3.30E-21 |
| COL4A2 | 6.014832 | 29.61177 | 2.299574 | 2.17E-21 | 2.13E-20 |
| COL7A1 | 0.222766 | 2.012452 | 3.17535 | 3.74E-19 | 2.97E-18 |
| COL9A1 | 0.003815 | 0.098516 | 4.690502 | 1.09E-23 | 1.82E-22 |
| COL9A2 | 0.209556 | 1.268776 | 2.59803 | 3.03E-05 | 5.28E-05 |
| DCC | 0.002432 | 0.067496 | 4.794589 | 0.00029 | 0.000444 |
| ECM1 | 13.05024 | 2.578934 | -2.33923 | 4.71E-27 | 1.96E-25 |
| FBLN1 | 1.584504 | 7.578863 | 2.257951 | 8.69E-06 | 1.58E-05 |
| GPC3 | 2.928596 | 268.643 | 6.519337 | 9.52E-22 | 9.94E-21 |
| ITGA3 | 0.642552 | 2.725815 | 2.084802 | 0.000443 | 0.000672 |
| ITGA6 | 2.511066 | 10.26107 | 2.030809 | 2.19E-23 | 3.28E-22 |
| ITGB4 | 0.692499 | 3.611712 | 2.382798 | 4.13E-10 | 1.23E-09 |
| LAMA3 | 0.296841 | 2.201284 | 2.890583 | 2.68E-12 | 9.75E-12 |
| LAMA4 | 0.50751 | 2.336141 | 2.20262 | 2.85E-25 | 7.95E-24 |
| LOXL1 | 0.513104 | 2.356147 | 2.199105 | 0.000755 | 0.001116 |
| MMP1 | 0.168919 | 1.991456 | 3.559418 | 3.91E-09 | 9.60E-09 |
| MMP14 | 5.296398 | 22.46025 | 2.08429 | 1.49E-15 | 7.78E-15 |
| TGFB2 | 0.242074 | 0.986745 | 2.027229 | 7.63E-05 | 0.000127 |
| VCAN | 0.433063 | 2.827909 | 2.707087 | 0.001571 | 0.002261 |
| ADAMTS14 | 0.059445 | 0.275447 | 2.212142 | 2.11E-10 | 6.66E-10 |
| ADAMTS16 | 0.032825 | 0.736825 | 4.488476 | 1.29E-05 | 2.32E-05 |
| ADAMTS6 | 0.026344 | 0.107127 | 2.02377 | 8.61E-08 | 1.89E-07 |
| BCAN | 0.0196 | 0.708038 | 5.17489 | 3.60E-21 | 3.34E-20 |
| CCDC80 | 0.475711 | 2.459867 | 2.370422 | 0.002274 | 0.003218 |
| COL15A1 | 0.178547 | 3.847748 | 4.429639 | 1.90E-28 | 3.17E-26 |
| COL8A1 | 0.154998 | 0.823044 | 2.408721 | 4.37E-10 | 1.28E-09 |
| CSPG4 | 0.211384 | 1.534994 | 2.860297 | 1.97E-25 | 6.59E-24 |
| DDR1 | 1.294314 | 5.286618 | 2.030157 | 0.000527 | 0.000785 |
| EGFL6 | 0.005367 | 0.162698 | 4.921957 | 1.23E-19 | 1.08E-18 |
| FBN3 | 0.015511 | 0.246332 | 3.989243 | 3.33E-08 | 7.73E-08 |
| GPC2 | 0.015872 | 0.114323 | 2.848531 | 6.97E-18 | 5.06E-17 |
| HAPLN1 | 0.002007 | 0.147078 | 6.195136 | 1.49E-07 | 3.19E-07 |
| ITGA2 | 0.202899 | 1.326741 | 2.709054 | 5.63E-14 | 2.41E-13 |
| LAMB4 | 0.005955 | 0.071579 | 3.587457 | 2.08E-15 | 1.02E-14 |
| LAMC1 | 4.315624 | 18.69556 | 2.115055 | 2.36E-23 | 3.28E-22 |
| LOXL2 | 0.579668 | 2.904087 | 2.324786 | 1.62E-24 | 3.39E-23 |
| MEP1A | 0.02275 | 3.547595 | 7.284842 | 9.04E-10 | 2.40E-09 |
| NPNT | 0.567868 | 3.411919 | 2.586957 | 0.00012 | 0.000191 |
| PAPLN | 0.515525 | 2.135851 | 2.050698 | 0.007793 | 0.010495 |
| PXDNL | 0.011348 | 0.107885 | 3.248923 | 4.51E-22 | 5.38E-21 |
| ROBO1 | 0.589047 | 6.641995 | 3.495161 | 1.06E-18 | 8.03E-18 |
| SEMA3B | 0.673746 | 2.987652 | 2.148736 | 7.95E-07 | 1.64E-06 |
| SPARCL1 | 4.476448 | 44.68947 | 3.319509 | 4.27E-17 | 2.85E-16 |
| SPOCK1 | 0.023216 | 0.850726 | 5.195511 | 5.31E-15 | 2.40E-14 |
| THBS4 | 0.054203 | 4.504795 | 6.376937 | 1.93E-27 | 1.07E-25 |
| TINAG | 0.012724 | 2.489043 | 7.611841 | 5.98E-10 | 1.72E-09 |
| UNC5A | 0.019527 | 0.264232 | 3.758229 | 1.30E-12 | 4.81E-12 |

Table S3. BMRGs-related prognostic genes.

| Gene | HR | HR.95L | HR.95H | *P* value |
| --- | --- | --- | --- | --- |
| ACAN | 1.646749494 | 1.080242612 | 2.510347086 | 0.020407234 |
| ADAM17 | 1.522361199 | 1.159630986 | 1.998552685 | 0.002473876 |
| ADAM9 | 1.3996437 | 1.187225965 | 1.650067085 | 6.24E-05 |
| ADAMTS3 | 2.331114313 | 1.210382169 | 4.489568733 | 0.01137551 |
| AGRN | 1.316005871 | 1.128266647 | 1.534984178 | 0.000471041 |
| ANG | 0.841041672 | 0.755488313 | 0.936283305 | 0.001562498 |
| CD151 | 1.303094057 | 1.087415177 | 1.561550875 | 0.004134105 |
| COL18A1 | 0.76379102 | 0.630789175 | 0.924836293 | 0.00577239 |
| CTSA | 1.665120095 | 1.289820041 | 2.149621531 | 9.11E-05 |
| CTSB | 1.26825695 | 1.015261821 | 1.584296443 | 0.036314445 |
| FBLN5 | 0.816190522 | 0.700460919 | 0.951040878 | 0.009230521 |
| FBN2 | 3.401475796 | 1.47052991 | 7.867937615 | 0.004219734 |
| FGF9 | 10.99036774 | 3.451241999 | 34.99846809 | 4.99E-05 |
| FRAS1 | 1.355923245 | 1.107312713 | 1.660351068 | 0.003215377 |
| FREM1 | 1.549686556 | 1.045115419 | 2.297859527 | 0.029293194 |
| ITGA3 | 1.168746832 | 1.011305532 | 1.350698789 | 0.034665099 |
| ITGB6 | 1.588214108 | 1.091272437 | 2.311452178 | 0.015685501 |
| LAMA4 | 1.283229836 | 1.018430221 | 1.616879368 | 0.034443907 |
| LAMB1 | 1.261358531 | 1.091307843 | 1.457907 | 0.001674744 |
| MMP1 | 1.533440654 | 1.306978143 | 1.79914274 | 1.57E-07 |
| MMP14 | 1.197756999 | 1.053346006 | 1.361966364 | 0.005908781 |
| MPZL2 | 1.292751537 | 1.06583444 | 1.567979485 | 0.009123467 |
| P3H1 | 2.096277457 | 1.595405735 | 2.754396001 | 1.08E-07 |
| PTPRF | 1.308443902 | 1.060351796 | 1.614582491 | 0.012201054 |
| ROBO3 | 1.548276533 | 1.078683212 | 2.222302337 | 0.017753216 |
| ROBO4 | 0.69649682 | 0.519914764 | 0.933052596 | 0.01533185 |
| SMC3 | 1.264811687 | 1.016248219 | 1.574171128 | 0.035348923 |
| SMOC1 | 0.776816641 | 0.64404409 | 0.936960844 | 0.008270179 |
| VCAN | 1.149090787 | 1.000357409 | 1.319937878 | 0.049412297 |
| ADAMTS5 | 2.411260692 | 1.685319507 | 3.449896654 | 1.46E-06 |
| ADAMTS7 | 1.711048839 | 1.051324289 | 2.78476219 | 0.030666552 |
| EGFL6 | 1.718837101 | 1.05515947 | 2.799956843 | 0.029583141 |
| EVA1B | 1.25222101 | 1.034684811 | 1.515492875 | 0.020878277 |
| EVA1C | 0.759622577 | 0.577735104 | 0.998773409 | 0.048981487 |
| FBLN2 | 0.863460717 | 0.752008311 | 0.991431077 | 0.03734138 |
| GPC1 | 1.309717465 | 1.127453904 | 1.52144565 | 0.000417115 |
| GPC2 | 2.406742914 | 1.153222328 | 5.022805502 | 0.019296753 |
| ITGA2 | 1.28917782 | 1.045900371 | 1.58904184 | 0.017285966 |
| ITGA5 | 1.351497838 | 1.115915751 | 1.636813895 | 0.00205445 |
| ITGAM | 1.277958624 | 1.047065303 | 1.559767321 | 0.015851558 |
| ITGAV | 1.286911027 | 1.10414073 | 1.499935602 | 0.001248465 |
| ITGB5 | 1.43744535 | 1.126883591 | 1.833595902 | 0.003479812 |
| ITGB7 | 0.572445501 | 0.342734311 | 0.956116272 | 0.033053845 |
| LAMC1 | 1.200543418 | 1.021868196 | 1.410460278 | 0.026210419 |
| MEP1A | 1.184840442 | 1.061686584 | 1.322279941 | 0.002454017 |
| MMP26 | 932832.2322 | 40.8573662 | 21297896914 | 0.007263252 |
| MMP7 | 1.118311683 | 1.020697419 | 1.225261275 | 0.016413789 |
| MMRN2 | 0.744795273 | 0.575309836 | 0.964210871 | 0.025311531 |
| NELL1 | 1.491717981 | 1.092382149 | 2.037036706 | 0.01187589 |
| PHF13 | 1.589801883 | 1.153405104 | 2.191311639 | 0.004630531 |
| ROBO1 | 1.210550922 | 1.057231518 | 1.38610466 | 0.005684577 |
| SLIT1 | 3.608965257 | 1.410642966 | 9.233116061 | 0.007410759 |
| SPARCL1 | 0.890932022 | 0.795176469 | 0.998218508 | 0.046513913 |
| TINAG | 1.171112992 | 1.048734655 | 1.307771832 | 0.005032112 |
| UNC5B | 1.336406378 | 1.104224773 | 1.617408022 | 0.002899621 |
| VTN | 0.891101802 | 0.80939283 | 0.981059372 | 0.018790421 |
